# Supplementary material for: Systematic coronary physiology improves level of agreement in diagnostic coronary angiography
Source: HighWire-hosted journal article supplement (doi:10.1136/openhrt-2023-002258), 2023-05-01
Supplement: openhrt-2023-002258supp001_data_supplement.pdf [file openhrt-2023-002258supp001_data_supplement.pdf]

*Systematic coronary physiology improves Heart Team level of agreement in diagnostic coronary angiography*  
Bashar et al  
January 2023

**Supplementary Table S1.** Baseline characteristics of the cases used in the study.

| Characteristics                          |             |
|------------------------------------------|-------------|
| Cases, n                                 | 150         |
| Age, (years), mean $\pm$ SD              | 63 $\pm$ 12 |
| Male sex, n (%)                          | 111 (74.0)  |
| BMI, (kg/m <sup>2</sup> ), mean $\pm$ SD | 29 $\pm$ 5  |
| Hypertension, n (%)                      | 87 (58.0)   |
| Hyperlipidaemia, n (%)                   | 117 (78.0)  |
| Diabetes mellitus, n (%)                 | 18 (12.0)   |
| Smoking history, n (%)                   | 104 (69.3)  |
| Previous MI, n (%)                       | 28 (18.7)   |
| Previous PCI, n (%)                      | 28 (18.7)   |

**Abbreviations:** BMI – Body Mass Index; MI – Myocardial Infarction; PCI – Percutaneous Coronary Intervention; SD – Standard deviation.

*Systematic coronary physiology improves Heart Team level of agreement in diagnostic coronary angiography*  
 Bashar et al  
 January 2023

**Supplementary Table S2.** Reported angiographic distribution of significant coronary disease by each specialty.

| Distribution of coronary disease (excluding LMS) | IC        | NIC       | CS        |
|--------------------------------------------------|-----------|-----------|-----------|
| No significant disease, n (%)                    | 29 (19.3) | 44 (29.3) | 40 (26.7) |
| One vessel disease, n (%)                        | 70 (46.7) | 71 (47.3) | 69 (46.0) |
| Two vessels disease, n (%)                       | 39 (26.0) | 28 (18.7) | 32 (21.3) |
| Three vessels disease, n (%)                     | 12 (8.0)  | 7 (4.7)   | 9 (6.0)   |
| <b>LMS disease</b>                               |           |           |           |
| All LMS disease, n (%)                           | 10 (6.7)  | 9 (6.0)   | 9 (6.0)   |
| Isolated LMS, n (%)                              | 0 (0.0)   | 1 (0.7)   | 1 (0.7)   |

**Abbreviations:** CS – Cardiac Surgeons; IC - Interventional Cardiologist; LMS – Left Main Stem; NIC - Non-Interventional Cardiologist.

*Systematic coronary physiology improves Heart Team level of agreement in diagnostic coronary angiography*  
Bashar et al  
January 2023

**Supplementary Table S3.** Total agreement proportions on the management approach across all the three cardiac specialties.

|           | Total agreement on Angiography | Total agreement after FFR |
|-----------|--------------------------------|---------------------------|
| MIR (%)   | 3.3                            | 0                         |
| OMT (%)   | 12.0                           | 32.7                      |
| PCI (%)   | 15.3                           | 28.0                      |
| CABG (%)  | 4.7                            | 5.3                       |
| Total (%) | 35.3                           | 66.0                      |

**Abbreviations:** CABG – Coronary Artery Bypass Graft; FFR – Fractional Flow Reserve; MIR – More Investigation Required; OMT – Optimal Medical Therapy; PCI – Percutaneous Coronary Intervention.

*Systematic coronary physiology improves Heart Team level of agreement in diagnostic coronary angiography*  
 Bashar et al  
 January 2023

**Supplementary Table S4.** plans allocation before and after FFR by the interventional cardiologists group.

|                                    |       | Angio with FFR Plan |     |      |     |         |
|------------------------------------|-------|---------------------|-----|------|-----|---------|
|                                    |       | OMT                 | PCI | CABG | MIR | Total   |
| Angio Plan                         | OMT   | 25                  | 0   | 0    | 1   | 26      |
|                                    | PCI   | 12                  | 42  | 1    | 1   | 56      |
|                                    | CABG  | 0                   | 2   | 20   | 0   | 22      |
|                                    | MIR   | 22                  | 12  | 4    | 8   | 46      |
|                                    | Total | 59                  | 56  | 25   | 10  | 150     |
| Stuart-Maxwell test                |       |                     |     |      |     | P value |
| Angio Plan vs. Angio with FFR Plan |       |                     |     |      |     | <0.001  |

**Abbreviations:** CABG – Coronary Artery Bypass Graft; FFR – Fractional Flow Reserve; MIR – More Investigation Required; OMT – Optimal Medical Therapy; PCI – Percutaneous Coronary Intervention.

*Systematic coronary physiology improves Heart Team level of agreement in diagnostic coronary angiography*  
 Bashar et al  
 January 2023

**Supplementary Table S5.** plans allocation before and after FFR by the non-interventional cardiologists group.

|                         |       | FFR Plan |     |      |     |         |
|-------------------------|-------|----------|-----|------|-----|---------|
|                         |       | OMT      | PCI | CABG | MIR | Total   |
| Angio Plan              | OMT   | 29       | 1   | 0    | 1   | 31      |
|                         | PCI   | 4        | 32  | 0    | 1   | 37      |
|                         | CABG  | 0        | 2   | 10   | 0   | 12      |
|                         | MIR   | 33       | 29  | 7    | 1   | 70      |
|                         | Total | 66       | 64  | 17   | 3   | 150     |
| Stuart-Maxwell test     |       |          |     |      |     | P value |
| Angio Plan vs. FFR Plan |       |          |     |      |     | <0.001  |

**Abbreviations:** CABG – Coronary Artery Bypass Graft; FFR – Fractional Flow Reserve; MIR – More Investigation Required; OMT – Optimal Medical Therapy; PCI – Percutaneous Coronary Intervention.

*Systematic coronary physiology improves Heart Team level of agreement in diagnostic coronary angiography*  
 Bashar et al  
 January 2023

**Supplementary Table S6.** plans allocation before and after FFR by the cardiac surgeons group.

|                         |       | FFR Plan |     |      |     |         |
|-------------------------|-------|----------|-----|------|-----|---------|
|                         |       | OMT      | PCI | CABG | MIR | Total   |
| Angio Plan              | OMT   | 34       | 5   | 0    | 2   | 41      |
|                         | PCI   | 14       | 46  | 5    | 5   | 70      |
|                         | CABG  | 3        | 3   | 10   | 3   | 19      |
|                         | MIR   | 3        | 7   | 6    | 4   | 20      |
|                         | Total | 54       | 61  | 21   | 14  | 150     |
| Stuart-Maxwell test     |       |          |     |      |     | P value |
| Angio Plan vs. FFR Plan |       |          |     |      |     | 0.053   |

**Abbreviations:** CABG – Coronary Artery Bypass Graft; FFR – Fractional Flow Reserve; MIR – More Investigation Required; OMT – Optimal Medical Therapy; PCI – Percutaneous Coronary Intervention.

Systematic coronary physiology improves Heart Team level of agreement in diagnostic coronary angiography  
Bashar et al  
January 2023

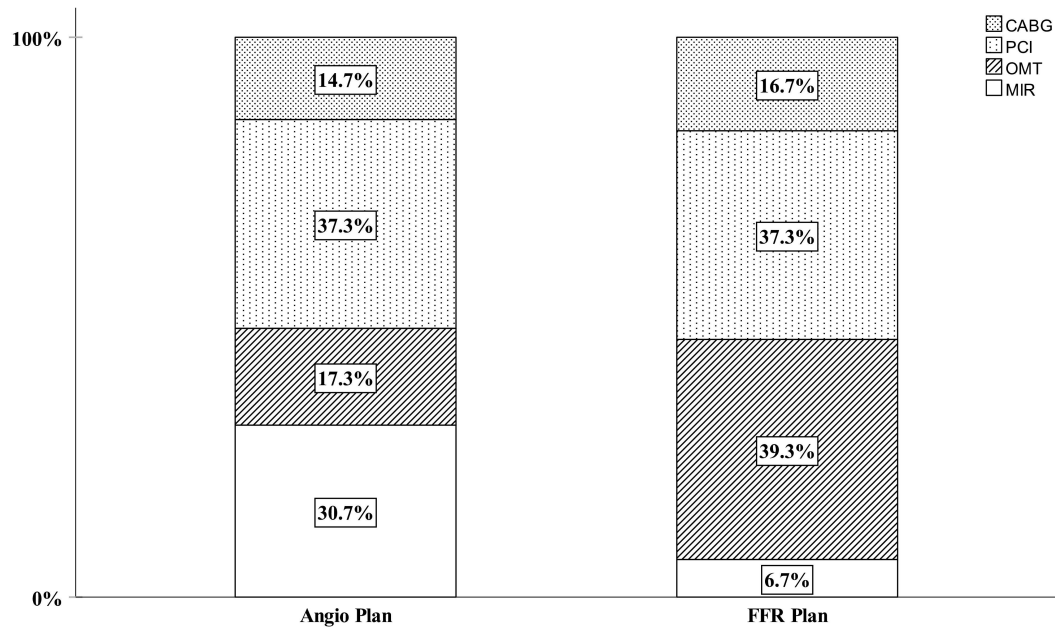

**Supplementary Figure S1.** plans allocation before and after FFR by the interventional cardiologists group. (CABG – Coronary Artery Bypass Graft; FFR – Fractional Flow Reserve; MIR – More Investigation Required; OMT – Optimal Medical Therapy; PCI – Percutaneous Coronary Intervention).

Systematic coronary physiology improves Heart Team level of agreement in diagnostic coronary angiography  
Bashar et al  
January 2023

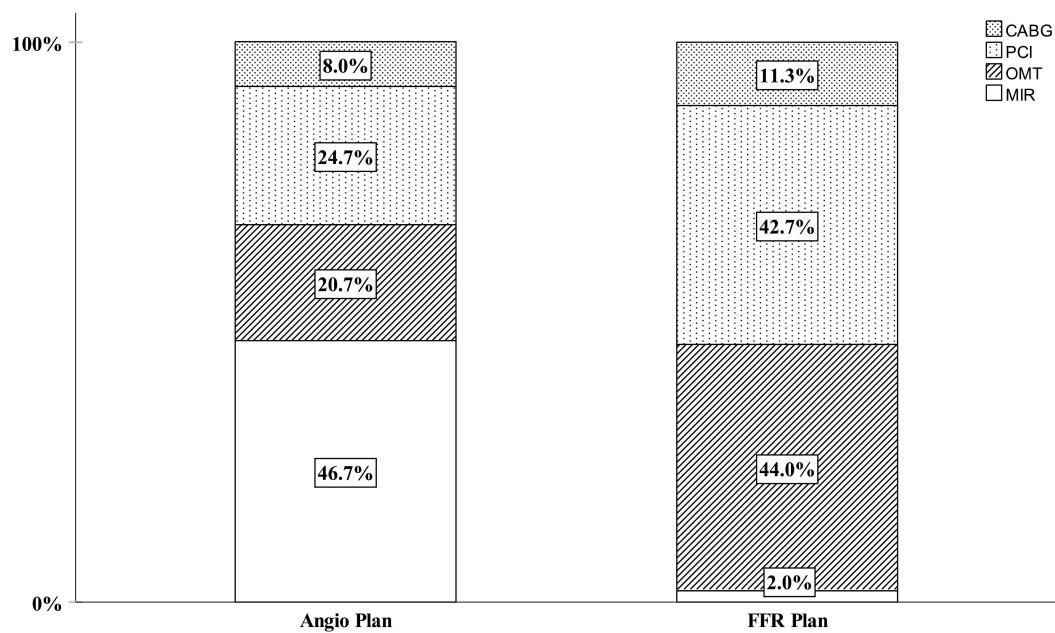

**Supplementary Figure S2.** plans allocation before and after FFR by the non-interventional cardiologists group. (CABG – Coronary Artery Bypass Graft; FFR – Fractional Flow Reserve; MIR – More Investigation Required; OMT – Optimal Medical Therapy; PCI – Percutaneous Coronary Intervention).



Systematic coronary physiology improves Heart Team level of agreement in diagnostic coronary angiography  
Bashar et al  
January 2023

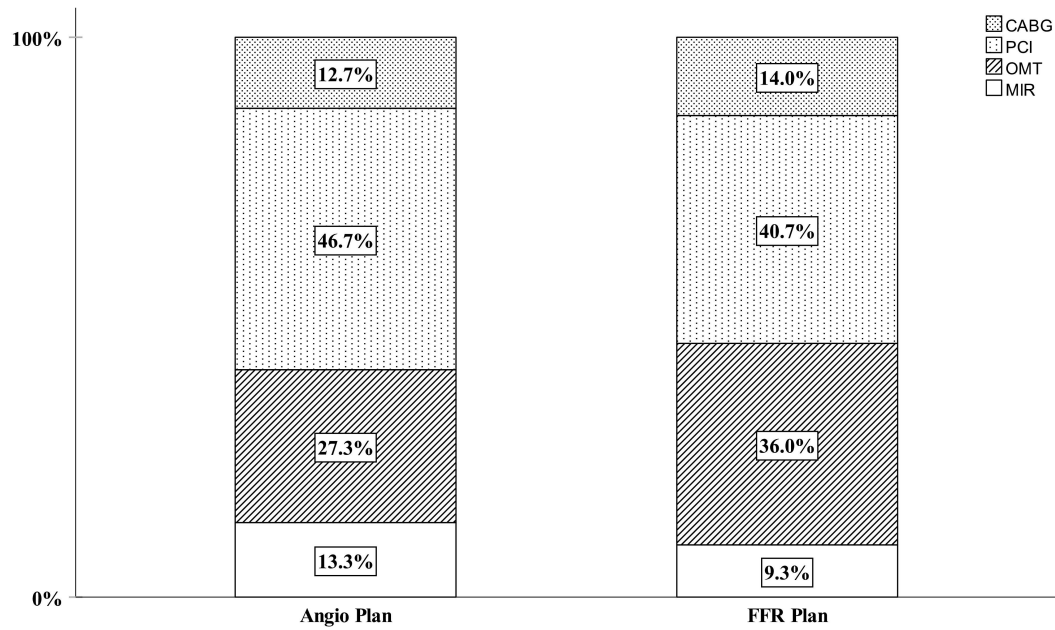

**Supplementary Figure S3.** plans allocation before and after FFR by the cardiac surgeons group. (CABG – Coronary Artery Bypass Graft; FFR – Fractional Flow Reserve; MIR – More Investigation Required; OMT – Optimal Medical Therapy; PCI – Percutaneous Coronary Intervention).

Systematic coronary physiology improves Heart Team level of agreement in diagnostic coronary angiography  
Bashar et al  
January 2023

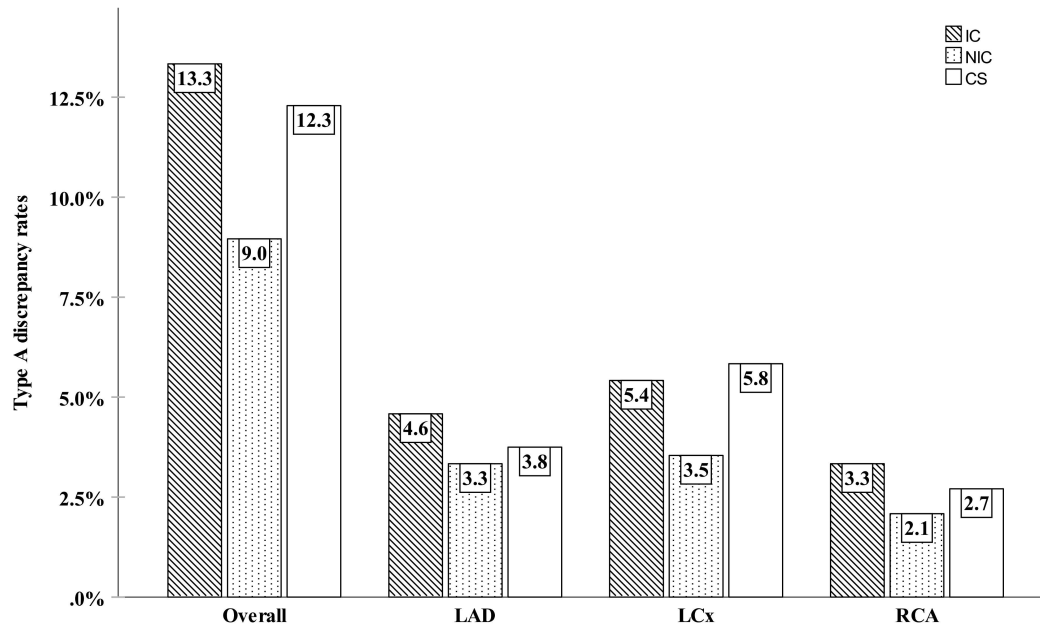

**Supplementary Figure S4.** Type A discrepancy rates by specialty group on angiography when compared with FFR (i.e., lesions were considered severe on angiography but had FFR value above 0.80). (CS – Cardiac Surgeons; IC - Interventional Cardiologists; LAD – Left Anterior Descending artery and its branches; LCx – Left Circumflex artery and its branches; NIC - Non-Interventional Cardiologists; RCA – Right coronary artery and its branches).

Systematic coronary physiology improves Heart Team level of agreement in diagnostic coronary angiography  
Bashar et al  
January 2023

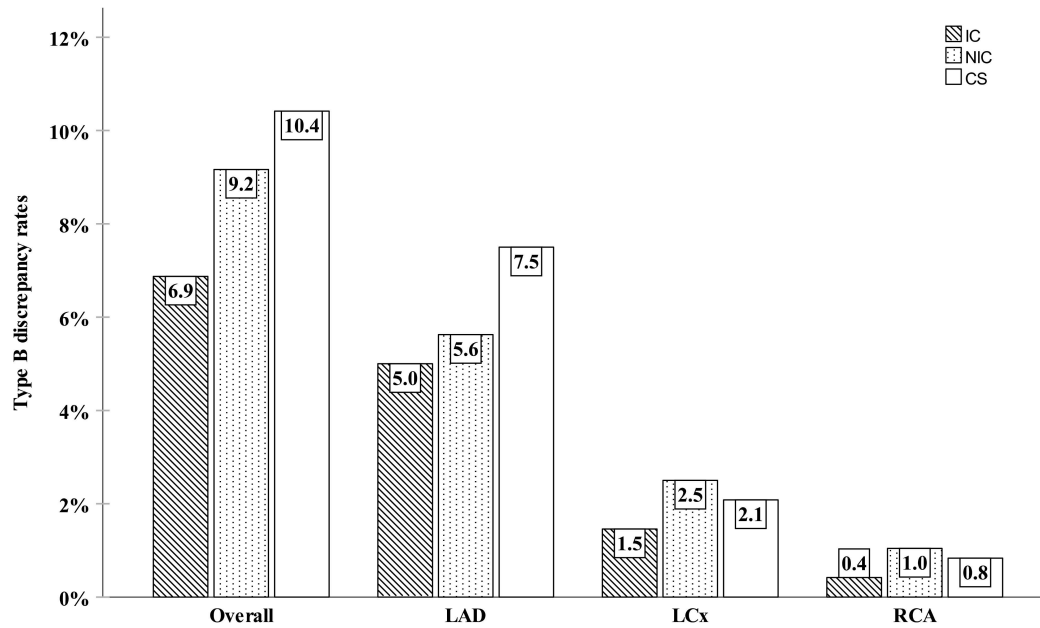

**Supplementary Figure S5.** Type B discrepancy rates by specialty group on angiography when compared with FFR (i.e., lesions were considered not severe on angiography but had FFR value of  $\leq 0.8$ ). (CS – Cardiac Surgeons; IC - Interventional Cardiologists; LAD – Left Anterior Descending artery and its branches; LCx – Left Circumflex artery and its branches; NIC - Non-Interventional Cardiologists; RCA – Right coronary artery and its branches).
